*Stenosis and Its Response to Carbon Dioxide, Brit. Heart J. 20: 516 (Oct.) 1958.*)

**CIRCULATORY SHUNTS** An improved method of detecting shunts by means of the nitrous oxide test utilizing 50 per cent nitrous oxide in the inspired mixture is described. In 78 tests in subjects without shunts the nitrous oxide content from the right atrium, ventricle or pulmonary artery was less than 15 per cent of the arterial content. In 72 tests on patients with left to right shunts this figure was 20 per cent or larger in all but 2 tests. Small shunts gave ratios of 20 to 40 per cent; intermediate shunts gave ratios of 40 to 60 per cent; large shunts gave ratios exceeding 60 per cent. (*Sanders, R. J., and Morrow, A. G.: The Diagnosis of Circulatory Shunts by the Nitrous Oxide Test, Circulation 18: 856 (Nov.) 1958.*)

**SHOCK** Sepsis as the cause for acute circulatory collapse is illustrated by 41 cases. Sixteen survivals resulted from prompt recognition and treatment with antibiotics, arterenol, oxygen, a moderate amount of blood and fluids and in some cases hydrocortisone. In spite of previous fear of dissemination of bacterial infection by cortisone therapy, its use appeared to be valuable in these cases. Operation in the face of critical illness is necessary in some. (*Altemeier, W. A., and Cole, W. R.: Nature and Treatment of Septic Shock, A. M. A. Arch. Surg. 77: 498 (Oct.) 1958.*)

**IRREVERSIBLE SHOCK** No absorption of Chromium-labeled endotoxin from various portions of the bowel was observed in normal dogs or in dogs subjected to irreversible hemorrhagic shock. Increased susceptibility of dogs subjected to reversible hemorrhage and then injected with 0.001 LD<sub>50</sub> dose of endotoxin was not demonstrated. (*Sanford, J. P., and Noyes, H. E.: Studies on the Absorption of "Escherichia Coli" Endotoxin from the Gastrointestinal Tract of Dogs in the Pathogenesis of "Irreversible" Hemorrhagic Shock, J. Clin. Invest. 37: 1425 (Oct.) 1958.*)

**SURGICAL BLOOD LOSS** Blood loss during surgery was measured by colorimetric and gravimetric means. The former was found to be more accurate. All methods underestimate

loss. Factors which influence the loss are type and duration of operation, surgical technique, patients' age and weight and presence of arteriosclerosis. No relation to preoperative blood pressure and type of anesthesia was found. (*Kragelund, E.: Operative and Post-operative Blood Loss, Acta chir. scandinav. 115: 160, 1958.*)

**BLOOD VOLUME** A transfusion index is established by utilizing the alteration in hemoglobin concentration following a blood transfusion expressed as a percentage of the normal response to a corresponding transfusion. Using this method the reduction in blood volume, particularly in patients with weight loss, can be demonstrated. (*Clements, H. J., and Kragelund, E.: Clinical Estimation of Blood Volume in Surgical Patients with Weight Loss, Acta chir. scandinav. 115: 170, 1958.*)

**HYPNOTIC ACTIVITY** Narcotics, with the exception of the alkaloid group containing morphine and allied substances, have the power of inhibiting at low concentrations the respiration of isolated brain tissue in the presence of glucose or pyruvate, especially if this is examined in the form of intact slices or as brain mitochondria. This applies to local anesthetics, to chlorpromazine and to the steroid narcotics. There appears to be a close relation between hypnotic activity and respiratory inhibition among narcotics and anesthetic agents of different chemical types. (*Quartel, J. H., and Scholefield, P. G.: Biochemical Aspects of Cerebral Dysfunction, Am. J. Med. 25: 420 (Sept.) 1958.*)

**NARCOTIC WITHDRAWAL IN INFANTS** The increase in incidence of narcotic addiction among adults during recent years has resulted in an increased number of infants born of addicted mothers. Withdrawal symptoms frequently appear within several hours following birth and consist of hyperactivity, trembling, twitchings, or convulsions; shrill, high-pitched, prolonged cry; and the appearance of being constantly "hungry" with sucking of the hands and fingers. Although a large percentage of these infants are prematurely born, with consequent high morbidity and
